# Supplementary material for: Targeting nonsense-mediated RNA decay does not increase progranulin levels in the Grn R493X mouse model of frontotemporal dementia
Source: PubMed Central journal article supplement (PMC9997918; doi:10.1371/journal.pone.0282822), 2023-03-09
Supplement: pone.0282822.s001.pdf [file pone.0282822.s001.pdf]

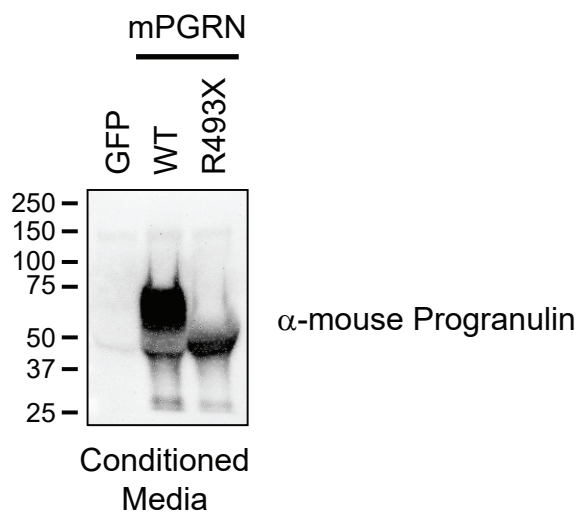

S1 Fig
