# Supplementary material for: Targeting nonsense-mediated RNA decay does not increase progranulin levels in the Grn R493X mouse model of frontotemporal dementia
Source: PubMed Central journal article supplement (PMC9997918; doi:10.1371/journal.pone.0282822), 2023-03-09
Supplement: pone.0282822.s003.pdf [file pone.0282822.s003.pdf]

**S1 Table. ASO sequences.**

| <b>ASO</b> | <b>Sequence</b>      |
|------------|----------------------|
| Control    | TTAGTTTAATCACGCTCG   |
| A          | CTCCTGCACTGTCTTTAC   |
| B          | ACTCCTGCACTGTCTTTA   |
| C          | GACTCCTGCACTGTCTTT   |
| D          | CAGACTCCTGCACTGTCT   |
| E          | CCAGACTCCTGCACTGTC   |
| F          | GCCCAGACTCCTGCACTG   |
| G          | GGCCCAGACTCCTGCACT   |
| H          | AGGCCAGACTCCTGCAC    |
| O          | AGACTCCTGCACTGTCTT   |
| P          | CCCAGACTCCTGCACTGT   |
| Malat1     | GCCAGGCTGGTTATGACTCA |
