# Supplementary material for: Targeting nonsense-mediated RNA decay does not increase progranulin levels in the Grn R493X mouse model of frontotemporal dementia
Source: PubMed Central journal article supplement (PMC9997918; doi:10.1371/journal.pone.0282822), 2023-03-09
Supplement: pone.0282822.s004.pdf [file pone.0282822.s004.pdf]

**S2 Table. qPCR primer sequences.**

| <b>Gene</b>                               | <b>Primer sequence</b>                                         |
|-------------------------------------------|----------------------------------------------------------------|
| <i>36B4</i>                               | Fwd: CACTGGTCTAGGACCCGAGAAG<br>Rev: GGTGCCTCTGAAGATTTTCG       |
| <i>Grn</i>                                | Fwd: TGGTTCACACACGATGCGTTTCAC<br>Rev: AAAGGCAAAGACACTGCCCTGTTG |
| <i>Malat1</i>                             | Fwd: AACCAAGTTTCCCCAGCTTTT<br>Rev: CTACATTCCCACCCAGCACT        |
| <i>Tra2b</i><br>(NMD-sensitive isoform)   | Fwd: TGGAATCAGAAAGCACTACGC<br>Rev: GAGTCTTCCTTGGAGCGAGA        |
| <i>Tra2b</i><br>(NMD-insensitive isoform) | Fwd: GGAGCTTGACAGCTTCAGGA<br>Rev: AAGCAGAACGGGATTCCC           |

Fwd, forward; Rev, reverse.
